# Supplementary material
Source: publisher figshare collection journal article supplement (https://acs.figshare.com/ndownloader/files/4475899)
Supplement: Supplementary file 1 [file 4475899]

**Cooperative effects in ternary Cu-Ni-Fe catalysts lead to enhanced alkene selectivity  
in alkyne hydrogenation**

Blaise Bridier and Javier Pérez-Ramírez

Institute for Chemical and Bioengineering, Department of Chemistry and Applied  
Biosciences, ETH Zurich, HCI E125, Wolfgang-Pauli-Strasse 10, CH-8093 Zurich, Switzerland.

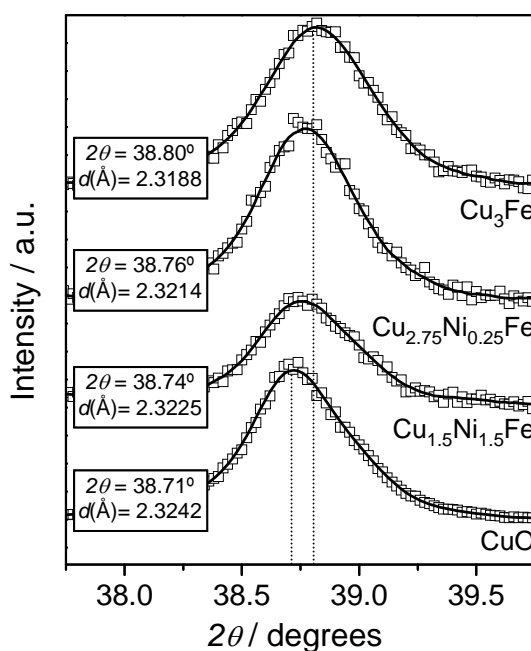

**Figure SI1.** X-ray diffraction patterns of the mixed  $\text{Cu}_{3-x}\text{Ni}_x\text{Fe}$  oxides, focusing on one of the main reflections of CuO. The position of this reflection ( $2\theta$  and  $d$  value) is indicated in each pattern. The shift to lower diffraction angles supports the formation of solid solutions  $\text{Cu}(\text{M})\text{O}_x$  with  $\text{M} = \text{Fe}, \text{Ni}$ .

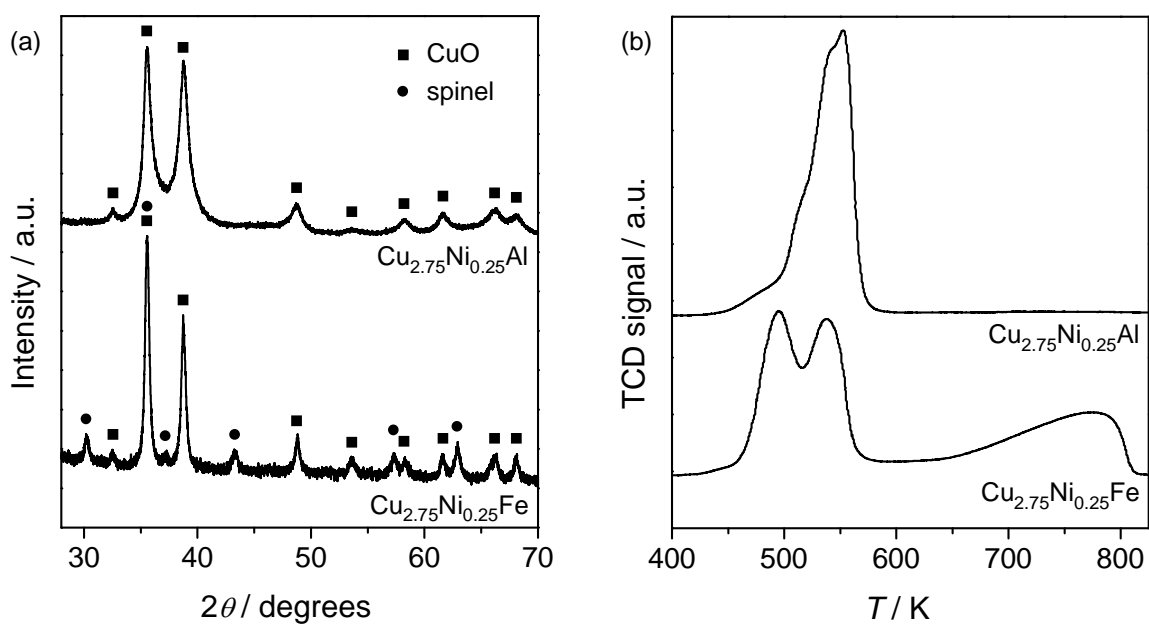

**Figure S12.** Characterization of the  $\text{Cu}_{2.75}\text{Ni}_{0.25}\text{Al}$  and  $\text{Cu}_{2.75}\text{Ni}_{0.25}\text{Fe}$  catalysts by (a) X-ray diffraction and (b) temperature-programmed reduction with  $\text{H}_2$ .

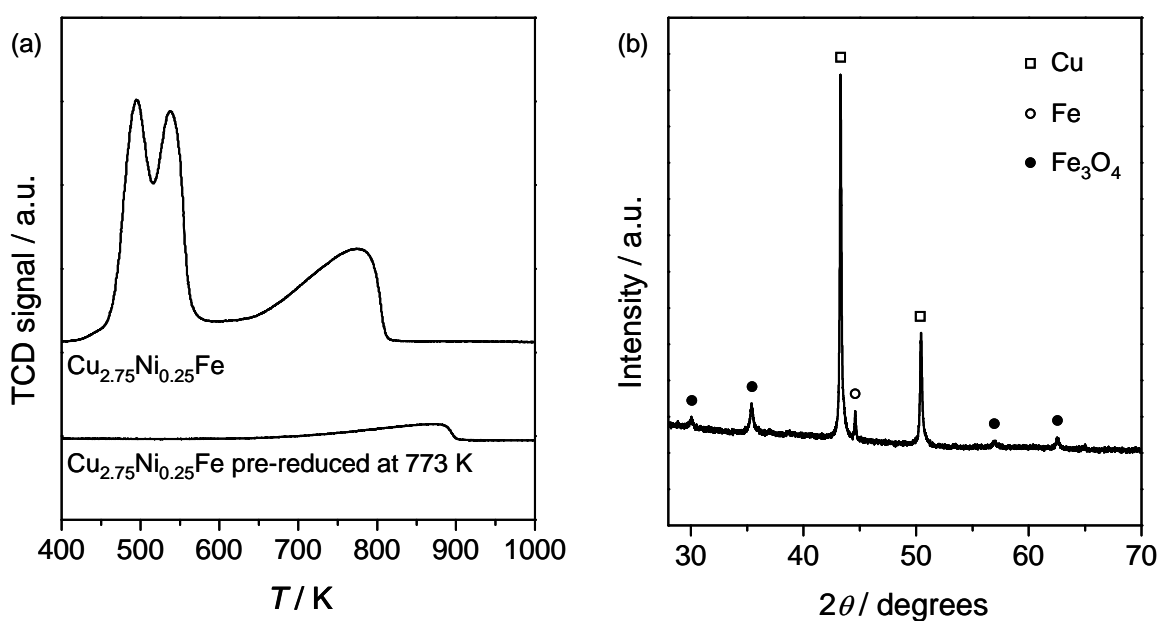

**Figure S13.** Characterization of the pre-reduced  $\text{Cu}_{2.75}\text{Ni}_{0.25}\text{Fe}$  catalyst by (a) temperature-programmed reduction with  $\text{H}_2$  and (b) X-ray diffraction). The  $\text{H}_2$ -TPR profile of the calcined catalyst is shown for comparison.

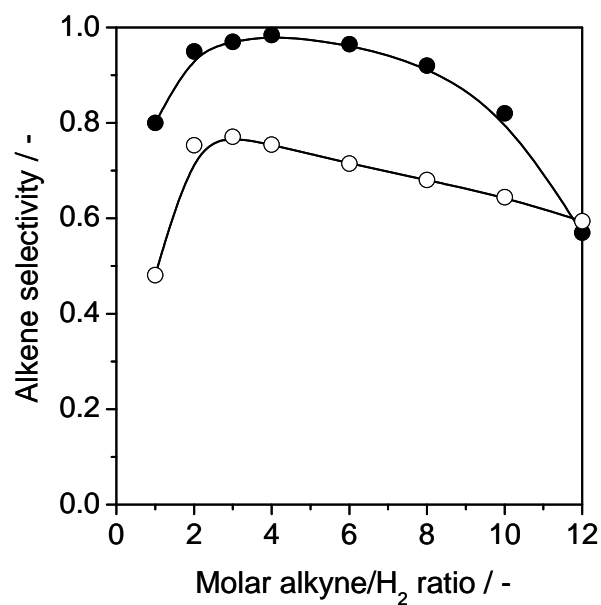

**Figure SI4.** Selectivity to (●) propene and (○) ethene vs. the molar H<sub>2</sub>/alkyne ratio in the feed over Cu<sub>2.75</sub>Ni<sub>0.25</sub>Fe. Conditions: 2.5 vol.% C<sub>3</sub>H<sub>4</sub> (C<sub>2</sub>H<sub>2</sub>) and 2.5-30 vol.% H<sub>2</sub>, balance He,  $T = 523$  K,  $SV = 16,800 \text{ cm}^3 \text{ g}^{-1} \text{ h}^{-1}$ , and  $P = 1$  bar.
